# Supplementary material for: Interaction of Body Mass Index on the Association Between N‐Terminal‐Pro‐b‐Type Natriuretic Peptide and Morbidity and Mortality in Patients With Acute Heart Failure: Findings From ASCEND‐HF (Acute Study of Clinical Effectiveness of Nesiritide in Decompensated Heart Failure)
Source: PubMed Central journal article supplement — J Am Heart Assoc. 2018 Feb 3;7(3):e006740. doi: 10.1161/JAHA.117.006740 (PMC5850232; doi:10.1161/jaha.117.006740), 2018-02-03
Supplement: JAH3-7-e006740-s001.pdf [file JAH3-7-e006740-s001.pdf]

# **SUPPLEMENTAL MATERIAL**

**Table S1. Comparison of Baseline Characteristics between Biomarker Cohort and Other ASCEND-HF patients in the Intention to Treat Population.**

| Characteristic                             | All Patients<br>(N=7141) | Cardiac Markers Cohort |                      | P-Value |
|--------------------------------------------|--------------------------|------------------------|----------------------|---------|
|                                            |                          | Excluded<br>(N=6456)   | In-Cohort<br>(N=687) |         |
| <b>Patient Characteristics</b>             |                          |                        |                      |         |
| Age, yrs (median, 25th-75th)               | 67 (56-76) [7141]        | 67 (56-76) [6454]      | 67 (55-78) [687]     | 0.41    |
| Female Sex                                 | 4697/7141 (65.8%)        | 4210/6454 (65.2%)      | 487/687 (70.9%)      | 0.003   |
| Race                                       |                          |                        |                      | <0.001  |
| White                                      | 3989/7140 (55.9%)        | 3516/6453 (54.5%)      | 473/687 (68.9%)      |         |
| Black                                      | 1077/7140 (15.1%)        | 884/6453 (13.7%)       | 193/687 (28.1%)      |         |
| Asian                                      | 1767/7140 (24.7%)        | 1758/6453 (27.2%)      | 9/687 (1.3%)         |         |
| Other                                      | 307/7140 (4.3%)          | 295/6453 (4.6%)        | 12/687 (1.7%)        |         |
| Region                                     |                          |                        |                      | <0.001  |
| Asia-Pacific                               | 1762/7141 (24.7%)        | 1761/6454 (27.3%)      | 1/687 (0.1%)         |         |
| Central Europe                             | 967/7141 (13.5%)         | 936/6454 (14.5%)       | 31/687 (4.5%)        |         |
| Latin America                              | 665/7141 (9.3%)          | 647/6454 (10.0%)       | 18/687 (2.6%)        |         |
| North America                              | 3243/7141 (45.4%)        | 2635/6454 (40.8%)      | 608/687 (88.5%)      |         |
| Western Europe                             | 504/7141 (7.1%)          | 475/6454 (7.4%)        | 29/687 (4.2%)        |         |
| BMI, kg/m <sup>2</sup> (median, 25th-75th) | 28 (24-33) [7077]        | 27 (24-32) [6391]      | 30 (26-36) [686]     | <0.001  |
| Weight, kg (median, 25th-75th)             | 78 (64-95) [7139]        | 77 (64-93) [6452]      | 89 (74-107) [687]    | <0.001  |
| Systolic BP, mmHg (median, 25th-75th)      | 123 (110-140) [7141]     | 123 (110-140) [6454]   | 125 (111-140) [687]  | 0.30    |
| Diastolic BP, mmHg (median, 25th-75th)     | 74 (66-83) [7140]        | 75 (67-83) [6454]      | 72 (64-83) [686]     | 0.005   |
| Heart Rate, bpm (median, 25th-75th)        | 82 (72-95) [7140]        | 82 (72-95) [6453]      | 78 (70-89) [687]     | <0.001  |
| Smoking Status                             |                          |                        |                      | <0.001  |
| Current Smoker                             | 963/7138 (13.5%)         | 865/6451 (13.4%)       | 98/687 (14.3%)       |         |
| Former Smoker                              | 2537/7138 (35.5%)        | 2221/6451 (34.4%)      | 316/687 (46.0%)      |         |
| Never Smoker                               | 3638/7138 (51.0%)        | 3365/6451 (52.2%)      | 273/687 (39.7%)      |         |
| Alcohol Use                                | 641/7142 (9.0%)          | 560/6455 (8.7%)        | 81/687 (11.8%)       | 0.007   |
| <b>Patient Status</b>                      |                          |                        |                      |         |
| HF Hospitalization within prior year       | 2785/7134 (39.0%)        | 2502/6448 (38.8%)      | 283/686 (41.3%)      | 0.21    |
| Ischemic Etiology                          | 4293/7140 (60.1%)        | 3869/6453 (60.0%)      | 424/687 (61.7%)      | 0.37    |
| Ejection Fraction, % (median, 25th-75th)   | 30 (20-37) [5477]        | 30 (20-36) [4920]      | 26 (20-40) [557]     | 0.023   |
| EF ≥= 50                                   | 661/5477 (12.1%)         | 574/4920 (11.7%)       | 87/557 (15.6%)       | 0.007   |
| Trop I > ULN                               | 635/2672 (23.8%)         | 557/2333 (23.9%)       | 78/339 (23.0%)       | 0.73    |

| Characteristic                                 | Cardiac Markers Cohort  |                         |                        | P-Value |
|------------------------------------------------|-------------------------|-------------------------|------------------------|---------|
|                                                | All Patients (N=7141)   | Excluded (N=6456)       | In-Cohort (N=687)      |         |
| NYHA Class                                     |                         |                         |                        | 0.002   |
| I                                              | 255/5893 (4.3%)         | 225/5401 (4.2%)         | 30/492 (6.1%)          |         |
| II                                             | 1098/5893 (18.6%)       | 989/5401 (18.3%)        | 109/492 (22.2%)        |         |
| III                                            | 2853/5893 (48.4%)       | 2610/5401 (48.3%)       | 243/492 (49.4%)        |         |
| IV                                             | 1687/5893 (28.6%)       | 1577/5401 (29.2%)       | 110/492 (22.4%)        |         |
| Hx of Myocardial Infarction                    | 2490/7140 (34.9%)       | 2240/6453 (34.7%)       | 250/687 (36.4%)        | 0.38    |
| <b>Patient History</b>                         |                         |                         |                        |         |
| Hx of Hypertension                             | 5150/7141 (72.1%)       | 4613/6454 (71.5%)       | 537/687 (78.2%)        | <0.001  |
| Hx of Diabetes                                 | 3046/7141 (42.7%)       | 2714/6454 (42.1%)       | 332/687 (48.3%)        | 0.002   |
| Atrial Fibrillation or Flutter                 | 2674/7141 (37.4%)       | 2396/6454 (37.1%)       | 278/687 (40.5%)        | 0.085   |
| Ventricular Tachycardia                        | 638/7141 (8.9%)         | 541/6454 (8.4%)         | 97/687 (14.1%)         | <0.001  |
| Hx of Hyperlipidemia                           | 2985/7140 (41.8%)       | 2538/6453 (39.3%)       | 447/687 (65.1%)        | <0.001  |
| Hx of Cerebrovascular Dz (incl Stroke)         | 842/7141 (11.8%)        | 740/6454 (11.5%)        | 102/687 (14.8%)        | 0.009   |
| Hx of PVD                                      | 740/7141 (10.4%)        | 664/6454 (10.3%)        | 76/687 (11.1%)         | 0.53    |
| Hx of Chronic Respiratory Disease (incl COPD)  | 1178/7140 (16.5%)       | 1015/6454 (15.7%)       | 163/686 (23.8%)        | <0.001  |
| Prior Valve Surgery                            | 333/7143 (4.7%)         | 297/6456 (4.6%)         | 36/687 (5.2%)          | 0.45    |
| Prior PCI                                      | 1169/7133 (16.4%)       | 1016/6448 (15.8%)       | 153/685 (22.3%)        | <0.001  |
| Prior CABG                                     | 1316/7141 (18.4%)       | 1121/6454 (17.4%)       | 195/687 (28.4%)        | <0.001  |
| Coronary Artery Disease                        | 3904/7139 (54.7%)       | 3495/6452 (54.2%)       | 409/687 (59.5%)        | 0.007   |
| Cancer within the prior 5 years                | 272/7141 (3.8%)         | 236/6454 (3.7%)         | 36/687 (5.2%)          | 0.039   |
| Chronic Liver Disease                          | 190/7141 (2.7%)         | 169/6454 (2.6%)         | 21/687 (3.1%)          | 0.50    |
| Hx Dialysis                                    | 75/7141 (1.1%)          | 61/6454 (0.9%)          | 14/687 (2.0%)          | 0.008   |
| <b>Patient Labs</b>                            |                         |                         |                        |         |
| Sodium, mmol/L (median, 25th-75th)             | 139 (136-141) [6682]    | 139 (136-141) [6028]    | 139 (136-141) [654]    | 0.11    |
| Creatinine, mg/dL (median, 25th-75th)          | 1.2 (1.0-1.6) [6762]    | 1.2 (1.0-1.6) [6101]    | 1.3 (1.0-1.7) [661]    | <0.001  |
| Blood Urea Nitrogen, mg/dL (median, 25th-75th) | 25 (18-39) [6595]       | 26 (18-39) [5942]       | 24 (18-35) [653]       | 0.034   |
| HGB, g/dL (median, 25th-75th)                  | 12.7 (11.3-14.0) [6592] | 12.7 (11.3-14.1) [5936] | 12.5 (11.1-13.7) [656] | <0.001  |
| <b>Patient Meds - Pre-Randomization</b>        |                         |                         |                        |         |
| ACE-i or ARB                                   | 4340/7139 (60.8%)       | 3905/6452 (60.5%)       | 435/687 (63.3%)        | 0.15    |
| Beta Blocker                                   | 4158/7139 (58.2%)       | 3633/6452 (56.3%)       | 525/687 (76.4%)        | <0.001  |

| Characteristic                                    | Cardiac Markers Cohort   |                         |                          | P-Value |
|---------------------------------------------------|--------------------------|-------------------------|--------------------------|---------|
|                                                   | All Patients (N=7141)    | Excluded (N=6456)       | In-Cohort (N=687)        |         |
| Aldosterone Antagonists                           | 1992/7140 (27.9%)        | 1827/6453 (28.3%)       | 165/687 (24.0%)          | 0.017   |
| Oral or Topical Nitrates                          | 1681/7140 (23.5%)        | 1511/6453 (23.4%)       | 170/687 (24.7%)          | 0.44    |
| Digoxin or Digitalis Glycoside                    | 1895/7139 (26.5%)        | 1756/6452 (27.2%)       | 139/687 (20.2%)          | <0.001  |
| Hydralazine                                       | 532/7140 (7.5%)          | 434/6453 (6.7%)         | 98/687 (14.3%)           | <0.001  |
| Calcium Channel Blocker                           | 923/7140 (12.9%)         | 816/6453 (12.6%)        | 107/687 (15.6%)          | 0.030   |
| Aspirin                                           | 3507/7140 (49.1%)        | 3103/6453 (48.1%)       | 404/687 (58.8%)          | <0.001  |
| Loop Diuretic                                     | 6788/7138 (95.1%)        | 6116/6451 (94.8%)       | 672/687 (97.8%)          | <0.001  |
| Clopidogrel                                       | 1142/7140 (16.0%)        | 1036/6453 (16.1%)       | 106/687 (15.4%)          | 0.67    |
| Anticoagulant                                     | 1722/7140 (24.1%)        | 1491/6453 (23.1%)       | 231/687 (33.6%)          | <0.001  |
| <b>Patient Implant/Rhythm</b>                     |                          |                         |                          |         |
| Implantable Cardioverter Defibrillator            | 1163/7141 (16.3%)        | 946/6454 (14.7%)        | 217/687 (31.6%)          | <0.001  |
| Biventricular Pacemaker (CRT)                     | 640/7141 (9.0%)          | 523/6454 (8.1%)         | 117/687 (17.0%)          | <0.001  |
| Pacemaker                                         | 440/7141 (6.2%)          | 395/6454 (6.1%)         | 45/687 (6.6%)            | 0.66    |
| <b>Patient Quality of Life</b>                    |                          |                         |                          |         |
| EQ5D -VAS (median, 25th-75th)                     | 0.60 (0.33-0.78) [6771]  | 0.60 (0.33-0.78) [6105] | 0.71 (0.51-0.82) [666]   | <0.001  |
| Depression treated with Meds                      | 562/7141 (7.9%)          | 458/6454 (7.1%)         | 104/687 (15.1%)          | <0.001  |
| <b>Patient Biomarkers</b>                         |                          |                         |                          |         |
| NTproBNP, pg/mL (median, 25th-75th) [n]           | 4501 (2098-9177) [3817]  | 4540 (2110-9200) [3587] | 3801 (1875-8117) [230]   |         |
| BNP, pg/mL (median, 25th-75th) [n]                | 990 (544-1850) [2632]    | 977 (528-1830) [2206]   | 1115 (633-1923) [426]    |         |
| Baseline NTproBNP, from biomarker data            | 5791 (3011-11971) [687]  | . (-.) [0]              | 5791 (3011-11971) [687]  |         |
| NTproBNP at 48-72 Hours, from biomarker data      | 3029 (1187-6645) [684]   | . (-.) [0]              | 3029 (1187-6645) [684]   |         |
| Change in NTproBNP at 48-72h, from biomarker data | -2182 (-5468--725) [684] | . (-.) [0]              | -2182 (-5468--725) [684] |         |
| <b>Symptoms at Randomization</b>                  |                          |                         |                          |         |
| Dyspnea                                           |                          |                         |                          | <0.001  |
| At Rest                                           | 4415/7140 (61.8%)        | 4031/6453 (62.5%)       | 384/687 (55.9%)          |         |
| With Minimal Activity                             | 2725/7140 (38.2%)        | 2422/6453 (37.5%)       | 303/687 (44.1%)          |         |
| Orthopnea                                         | 5485/7132 (76.9%)        | 4925/6445 (76.4%)       | 560/687 (81.5%)          | 0.003   |
| Nocturnal Dyspnea                                 | 4449/7126 (62.4%)        | 4029/6439 (62.6%)       | 420/687 (61.1%)          | 0.46    |
| Weight Gain                                       | 4673/7118 (65.7%)        | 4168/6432 (64.8%)       | 505/686 (73.6%)          | <0.001  |

| Characteristic                                | Cardiac Markers Cohort |                   |                   | P-Value |
|-----------------------------------------------|------------------------|-------------------|-------------------|---------|
|                                               | All Patients (N=7141)  | Excluded (N=6456) | In-Cohort (N=687) |         |
| Pulmonary Congestion / Edema w rales/crackles | 6201/7136 (86.9%)      | 5655/6449 (87.7%) | 546/687 (79.5%)   | <0.001  |
| X-ray indicating pulm cong                    | 5206/6419 (81.1%)      | 4714/5768 (81.7%) | 492/651 (75.6%)   | <0.001  |
| Peripheral Edema                              | 5330/7140 (74.6%)      | 4775/6453 (74.0%) | 555/687 (80.8%)   | <0.001  |
| Elevated JVP                                  | 4003/7136 (56.1%)      | 3589/6449 (55.7%) | 414/687 (60.3%)   | 0.021   |
| S3 Gallop                                     | 1668/7136 (23.4%)      | 1514/6449 (23.5%) | 154/687 (22.4%)   | 0.53    |
| MV Regurg                                     | 1927/7136 (27.0%)      | 1754/6449 (27.2%) | 173/687 (25.2%)   | 0.26    |

Abbreviations:

BMI = body mass index

BP = blood pressure

HF = heart failure

EF= ejection fraction

Trop I = troponin I

ULN = upper limit of normal

NYHA = New York Heart Association

PVD = peripheral vascular disease

PCI – percutaneous coronary intervention

CABG = coronary artery bypass grafting

HGB= hemoglobin

ACEI = angiotensin converting enzyme inhibitor

ARB = angiotensin receptor blocker

EQ5D = EuroQol-5 Dimensions survey

VAS = Visual Analog scale

JVP = jugular venous pulsation

MV = mitral valve

**Table S2. Event Rates by Obesity Class.**

| <b>Outcomes</b>                       | <b>Obesity Class</b>       |                                   |                            |                            |                              |
|---------------------------------------|----------------------------|-----------------------------------|----------------------------|----------------------------|------------------------------|
|                                       | <b>Overall<br/>(N=686)</b> | <b>Non-<br/>Obese<br/>(N=346)</b> | <b>Class I<br/>(N=147)</b> | <b>Class II<br/>(N=86)</b> | <b>Class III<br/>(N=107)</b> |
| 30-Day Death or HF-Rehosp.            | 86                         | 42                                | 17                         | 9                          | 18                           |
| 30-Day Death or All Cause-<br>Rehosp. | 141                        | 73                                | 26                         | 12                         | 30                           |
| Worsening Renal Function              | 65                         | 29                                | 11                         | 13                         | 12                           |
| 180-Day Death                         | 78                         | 53                                | 9                          | 7                          | 9                            |
